# Supplementary material
Source: Springer Nature journal article supplement (https://www.springermedizin.de/resource/supplementary/12978_2010_259_MOESM3_ESM.pdf/9602852)
Supplement: MOESM3 [file 9602852]

**80 KM**

**40 KM**

**20 KM**

**District  
Hospital**

$X_1 = 2; X_2 = 2$

$C = 4$

$X_1 = 3; X_2 = 3$

$C = 6$

$X_1 = 3; X_2 = 3$

$C = 6$
